# Supplementary material for: Impact of non-menthol flavours in e-cigarettes on perceptions and use: an updated systematic review
Source: PubMed Central journal article supplement — BMJ Open. 2019 Oct 16;9(10):e031598. doi: 10.1136/bmjopen-2019-031598 (PMC6797351; doi:10.1136/bmjopen-2019-031598), 2019-10-16
Supplement: bmjopen-2019-031598supp001.pdf [file bmjopen-2019-031598supp001.pdf]

## Supplementary File 1. Search String

Final PubMed search string: ((((((smoke OR smoker OR smokers OR smokes OR smokings OR smoking OR cigarette OR cigarettes OR cigar OR cigars OR cigarillos OR cigarillo OR hookahs OR hookah OR waterpipe OR waterpipes OR narghile OR narghiles OR argila OR argiles OR tobacco OR tobaccos OR cigar\* OR smoke\* OR tobacco\* OR ends OR "electronic nicotine delivery system\*" OR vape OR vapor OR vapour OR vapours OR vapors OR vapor OR vapors OR vaping OR snus OR pipe OR pipes OR "e-cigarette" OR "e-cigarettes" OR bidi OR bidis OR kretek OR kreteks OR chewing tobacco OR snuff OR shisha OR "water pipe" OR "water pipes" OR goza OR narkeela OR "hubble bubble" OR hukkah OR hukkass OR hukka OR argileh) AND (flavor OR flavor\* OR flavour OR flavour\* OR flavors OR flavours OR flavoring OR flavouring OR flavorings OR flavourings OR flavoured OR flavoured OR flavoring OR flavorings OR flavouring OR flavourings OR flavouring OR flavoring OR flavourants OR flavorants)) OR (kretek OR kreteks OR bidi OR bidis))) 2016/04/04:2018/03/21 [edat])
