# Supplementary material for: Impact of non-menthol flavours in e-cigarettes on perceptions and use: an updated systematic review
Source: PubMed Central journal article supplement — BMJ Open. 2019 Oct 16;9(10):e031598. doi: 10.1136/bmjopen-2019-031598 (PMC6797351; doi:10.1136/bmjopen-2019-031598), 2019-10-16
Supplement: bmjopen-2019-031598supp003.pdf [file bmjopen-2019-031598supp003.pdf]

**Supplementary Table 2. Risk of bias assessed by Quality Assessment Tool (QATSDD) (\* indicates study was included in original 2016 review)**

Note. <sup>a</sup> Percentage = the total score of a study / the full score 42 (14 items x 3 per item)

| Study ID (Author, Year)                                                                                                   | Amato, 2015[26]* | Audrain-McGovern 2016[27] | Barnes 2017[28] | Berg, 2016[29]* | Bold 2016[30] | Brozek, 2017[31] | Buckell, 2018[32] | Camenga 2017[33] | Chen 2017[34] | Chen 2018[35] | Clarke, 2017[25] | Coleman 2017[36] | Cooper 2016[37] | Czoli, 2016[38]* |
|---------------------------------------------------------------------------------------------------------------------------|------------------|---------------------------|-----------------|-----------------|---------------|------------------|-------------------|------------------|---------------|---------------|------------------|------------------|-----------------|------------------|
| Total score                                                                                                               | 35               | 22                        | 27              | 29              | 26            | 24               | 31                | 26               | 25            | 29            | 31               | 28               | 37              | 31               |
| % <sup>a</sup>                                                                                                            | 83%              | 52%                       | 64%             | 69%             | 62%           | 57%              | 74%               | 62%              | 60%           | 69%           | 74%              | 67%              | 88%             | 74%              |
| Explicit theoretical framework                                                                                            | 0                | 1                         | 0               | 0               | 0             | 0                | 0                 | 0                | 0             | 0             | 3                | 0                | 2               | 3                |
| Statement of aims/objectives in main body of report                                                                       | 3                | 2                         | 3               | 3               | 3             | 3                | 3                 | 3                | 3             | 3             | 3                | 3                | 3               | 3                |
| Clear description of research setting                                                                                     | 3                | 1                         | 1               | 3               | 2             | 3                | 3                 | 2                | 2             | 3             | 3                | 3                | 3               | 3                |
| Evidence of sample size considered in terms of analysis                                                                   | 3                | 0                         | 1               | 3               | 1             | 1                | 1                 | 1                | 1             | 1             | 0                | 0                | 1               | 0                |
| Representative sample of target group of a reasonable size                                                                | 3                | 1                         | 1               | 2               | 2             | 2                | 3                 | 1                | 3             | 3             | 1                | 3                | 2               | 2                |
| Description of procedure for data collection                                                                              | 3                | 3                         | 3               | 3               | 3             | 1                | 3                 | 3                | 1             | 3             | 2                | 3                | 3               | 3                |
| Rationale for choice of data collection tool(s)                                                                           | 3                | 3                         | 2               | 2               | 1             | 0                | 2                 | 1                | 3             | 2             | 3                | 1                | 3               | 2                |
| Detailed recruitment data                                                                                                 | 3                | 1                         | 3               | 3               | 2             | 0                | 1                 | 3                | 1             | 2             | 1                | 3                | 3               | 1                |
| Statistical assessment of reliability and validity of measurement tool(s) (Quantitative only)                             | 1                | 1                         | 1               | 0               | 0             | 2                | 3                 | 0                | 0             | 0             | 1                | 0                | 2               | 0                |
| Fit between stated research question and method of data collection (Quantitative)                                         | 3                | 3                         | 3               | 2               | 3             | 3                | 3                 | 3                | 3             | 3             | 3                | 3                | 3               | 2                |
| Fit between stated research question and format and content of data collection tool e.g. interview schedule (Qualitative) | -                | -                         | -               | -               | -             | -                | -                 | -                | -             | -             | -                | -                | -               | -                |
| Fit between research question and method of analysis                                                                      | 3                | 3                         | 3               | 3               | 3             | 3                | 3                 | 3                | 3             | 3             | 3                | 3                | 3               | 3                |
| Good justification for analytical method selected                                                                         | 1                | 3                         | 3               | 2               | 3             | 3                | 3                 | 3                | 2             | 3             | 3                | 3                | 3               | 3                |
| Assessment of reliability of analytical process (Qualitative only)                                                        | -                | -                         | -               | -               | -             | -                | -                 | -                | -             | -             | -                | -                | -               | -                |

|                                                |   |   |   |   |   |   |   |   |   |   |   |   |   |   |
|------------------------------------------------|---|---|---|---|---|---|---|---|---|---|---|---|---|---|
| Evidence of user involvement in design         | 3 | 0 | 0 | 0 | 0 | 1 | 0 | 0 | 0 | 0 | 2 | 0 | 3 | 3 |
| Strengths and limitations critically discussed | 3 | 0 | 3 | 3 | 3 | 2 | 3 | 3 | 3 | 3 | 3 | 3 | 3 | 3 |

| Study ID (Author, Year)                                                                                                   | Dai 2016[39] | Elkami 2016[40] | Eiter, 2010[41]* | Eiter 2016[42] | Farsalinos, 2013[43]* | Farsalinos, 2014[44]* | Ford, 2016[45]* | Goldenson 2016[46] | Gubner 2018[47] | Harrell 2017a[48] | Harrell 2017b[49] | Kim 2016[50] | Kinouani 2017[51] | Kong, 2014[52]* | Krishnan-Sarin, 2014[53]* |
|---------------------------------------------------------------------------------------------------------------------------|--------------|-----------------|------------------|----------------|-----------------------|-----------------------|-----------------|--------------------|-----------------|-------------------|-------------------|--------------|-------------------|-----------------|---------------------------|
| Total score                                                                                                               | 31           | 33              | 20               | 27             | 16                    | 19                    | 32              | 22                 | 28              | 31                | 27                | 28           | 27                | 31              | 26                        |
| % <sup>a</sup>                                                                                                            | 74%          | 79%             | 48%              | 64%            | 38%                   | 45%                   | 76%             | 52%                | 67%             | 74%               | 64%               | 67%          | 64%               | 74%             | 62%                       |
| Explicit theoretical framework                                                                                            | 1            | 0               | 0                | 0              | 0                     | 0                     | 0               | 0                  | 0               | 0                 | 0                 | 0            | 0                 | 0               | 0                         |
| Statement of aims/objectives in main body of report                                                                       | 3            | 3               | 3                | 3              | 3                     | 3                     | 3               | 3                  | 3               | 3                 | 3                 | 3            | 3                 | 3               | 3                         |
| Clear description of research setting                                                                                     | 3            | 3               | 3                | 3              | 3                     | 3                     | 3               | 2                  | 3               | 3                 | 3                 | 3            | 3                 | 3               | 3                         |
| Evidence of sample size considered in terms of analysis                                                                   | 0            | 2               | 1                | 3              | 0                     | 0                     | 3               | 1                  | 0               | 1                 | 0                 | 1            | 0                 | 1               | 1                         |
| Representative sample of target group of a reasonable size                                                                | 3            | 1               | 2                | 1              | 1                     | 2                     | 3               | 1                  | 2               | 2                 | 2                 | 1            | 1                 | 3               | 3                         |
| Description of procedure for data collection                                                                              | 3            | 3               | 2                | 2              | 1                     | 2                     | 3               | 3                  | 3               | 3                 | 2                 | 3            | 3                 | 3               | 3                         |
| Rationale for choice of data collection tool(s)                                                                           | 2            | 3               | 1                | 2              | 1                     | 1                     | 2               | 2                  | 2               | 3                 | 2                 | 3            | 2                 | 3               | 0                         |
| Detailed recruitment data                                                                                                 | 3            | 3               | 1                | 1              | 1                     | 1                     | 1               | 1                  | 3               | 3                 | 2                 | 1            | 3                 | 3               | 3                         |
| Statistical assessment of reliability and validity of measurement tool(s) (Quantitative only)                             | 1            | 2               | 0                | 0              | 0                     | 0                     | 0               | 0                  | 0               | 1                 | 1                 | 1            | 0                 | 0               | 0                         |
| Fit between stated research question and method of data collection (Quantitative)                                         | 3            | 3               | 2                | 3              | 1                     | 2                     | 3               | 3                  | 3               | 3                 | 3                 | 3            | 3                 | 2               | 2                         |
| Fit between stated research question and format and content of data collection tool e.g. interview schedule (Qualitative) | -            | -               | -                | -              | -                     | -                     | -               | -                  | -               | -                 | -                 | -            | -                 | -               | -                         |
| Fit between research question and method of analysis                                                                      | 3            | 3               | 2                | 3              | 2                     | 2                     | 3               | 3                  | 3               | 3                 | 3                 | 3            | 3                 | 3               | 3                         |
| Good justification for analytical method selected                                                                         | 3            | 2               | 1                | 3              | 1                     | 1                     | 3               | 3                  | 3               | 3                 | 3                 | 3            | 3                 | 3               | 3                         |
| Assessment of reliability of analytical process (Qualitative only)                                                        | -            | -               | -                | -              | -                     | -                     | -               | -                  | -               | -                 | -                 | -            | -                 | -               | -                         |
| Evidence of user involvement in design                                                                                    | 0            | 3               | 0                | 0              | 0                     | 0                     | 2               | 0                  | 1               | 0                 | 0                 | 0            | 0                 | 2               | 0                         |
| Strengths and limitations critically discussed                                                                            | 3            | 2               | 2                | 3              | 2                     | 2                     | 3               | 0                  | 2               | 3                 | 3                 | 3            | 3                 | 2               | 2                         |

| Study ID (Author, Year)                                                                                                   | Lee 2017a[54] | Lee 2017b[55] | Litt 2016[56] | Maglalang 2016[57] | Morean 2018[58] | Nonemaker, 2016[59]* | Patel 2017[60] | Pepper, 2013[61]* | Pepper, 2014[62]* | Pepper 2016[63] | Pesko 2016[64] | Russell 2018[65] | Rutten 2015[66] | Shang 2017[67] |
|---------------------------------------------------------------------------------------------------------------------------|---------------|---------------|---------------|--------------------|-----------------|----------------------|----------------|-------------------|-------------------|-----------------|----------------|------------------|-----------------|----------------|
| Total score                                                                                                               | 32            | 28            | 27            | 27                 | 26              | 24                   | 34             | 35                | 34                | 28              | 29             | 24               | 32              | 27             |
| % <sup>a</sup>                                                                                                            | 76%           | 67%           | 64%           | 64%                | 62%             | 57%                  | 81%            | 83%               | 81%               | 67%             | 69%            | 57%              | 76%             | 64%            |
| Explicit theoretical framework                                                                                            | 3             | 0             | 0             | 0                  | 0               | 0                    | 3              | 3                 | 2                 | 0               | 0              | 0                | 0               | 0              |
| Statement of aims/objectives in main body of report                                                                       | 3             | 3             | 3             | 3                  | 3               | 3                    | 3              | 3                 | 3                 | 3               | 3              | 3                | 3               | 3              |
| Clear description of research setting                                                                                     | 3             | 3             | 3             | 3                  | 3               | 3                    | 3              | 3                 | 3                 | 3               | 3              | 2                | 3               | 1              |
| Evidence of sample size considered in terms of analysis                                                                   | 0             | 0             | 0             | 1                  | 0               | 0                    | 1              | 1                 | 1                 | 0               | 0              | 1                | 1               | 3              |
| Representative sample of target group of a reasonable size                                                                | 2             | 3             | 1             | 1                  | 1               | 2                    | 3              | 2                 | 3                 | 3               | 2              | 1                | 3               | 3              |
| Description of procedure for data collection                                                                              | 3             | 3             | 3             | 3                  | 3               | 3                    | 3              | 3                 | 2                 | 3               | 3              | 3                | 3               | 2              |
| Rationale for choice of data collection tool(s)                                                                           | 3             | 3             | 2             | 1                  | 1               | 0                    | 3              | 2                 | 3                 | 1               | 2              | 0                | 2               | 3              |
| Detailed recruitment data                                                                                                 | 3             | 3             | 3             | 3                  | 3               | 1                    | 3              | 3                 | 3                 | 3               | 2              | 3                | 3               | 1              |
| Statistical assessment of reliability and validity of measurement tool(s) (Quantitative only)                             | 0             | 0             | 0             | 0                  | 0               | 0                    | 0              | 3                 | 0                 | 0               | 2              | 0                | 0               | 0              |
| Fit between stated research question and method of data collection (Quantitative)                                         | 3             | 3             | 3             | 3                  | 3               | 3                    | 3              | 3                 | 3                 | 3               | 3              | 3                | 3               | 3              |
| Fit between stated research question and format and content of data collection tool e.g. interview schedule (Qualitative) | -             | -             | -             | -                  | -               | -                    | -              | -                 | -                 | -               | -              | -                | -               | -              |
| Fit between research question and method of analysis                                                                      | 3             | 3             | 3             | 3                  | 3               | 3                    | 3              | 3                 | 3                 | 3               | 3              | 3                | 3               | 3              |
| Good justification for analytical method selected                                                                         | 3             | 2             | 3             | 3                  | 3               | 3                    | 3              | 3                 | 3                 | 3               | 3              | 2                | 3               | 3              |
| Assessment of reliability of analytical process (Qualitative only)                                                        | -             | -             | -             | -                  | -               | -                    | -              | -                 | -                 | -               | -              | -                | -               | -              |
| Evidence of user involvement in design                                                                                    | 0             | 0             | 0             | 0                  | 0               | 0                    | 0              | 0                 | 2                 | 0               | 0              | 0                | 2               | 0              |
| Strengths and limitations critically discussed                                                                            | 3             | 2             | 3             | 3                  | 3               | 3                    | 3              | 3                 | 3                 | 3               | 3              | 3                | 3               | 2              |

| Study ID (Author, Year)                                                                                                   | Shiffman, 2015[68]* | Shiplo, 2015[69]* | Spears 2018[70] | Tackett, 2015[71]* | Tsai 2018[72] | Vasiljevic, 2016[73]* | Weaver 2018[74] | Yingst, 2015[75]* |
|---------------------------------------------------------------------------------------------------------------------------|---------------------|-------------------|-----------------|--------------------|---------------|-----------------------|-----------------|-------------------|
| Total score                                                                                                               | 26                  | 27                | 29              | 26                 | 22            | 33                    | 30              | 21                |
| % <sup>a</sup>                                                                                                            | 62%                 | 64%               | 69%             | 62%                | 52%           | 79%                   | 71%             | 50%               |
| Explicit theoretical framework                                                                                            | 0                   | 0                 | 0               | 0                  | 0             | 2                     | 0               | 0                 |
| Statement of aims/objectives in main body of report                                                                       | 3                   | 3                 | 3               | 3                  | 2             | 3                     | 3               | 3                 |
| Clear description of research setting                                                                                     | 3                   | 3                 | 3               | 3                  | 3             | 3                     | 3               | 2                 |
| Evidence of sample size considered in terms of analysis                                                                   | 2                   | 3                 | 0               | 3                  | 1             | 3                     | 1               | 0                 |
| Representative sample of target group of a reasonable size                                                                | 1                   | 2                 | 3               | 1                  | 3             | 2                     | 3               | 2                 |
| Description of procedure for data collection                                                                              | 3                   | 3                 | 2               | 2                  | 2             | 2                     | 3               | 2                 |
| Rationale for choice of data collection tool(s)                                                                           | 2                   | 0                 | 2               | 2                  | 0             | 3                     | 2               | 1                 |
| Detailed recruitment data                                                                                                 | 3                   | 3                 | 3               | 2                  | 0             | 1                     | 3               | 3                 |
| Statistical assessment of reliability and validity of measurement tool(s) (Quantitative only)                             | 1                   | 0                 | 1               | 0                  | 0             | 3                     | 0               | 0                 |
| Fit between stated research question and method of data collection (Quantitative)                                         | 1                   | 2                 | 3               | 3                  | 3             | 2                     | 3               | 3                 |
| Fit between stated research question and format and content of data collection tool e.g. interview schedule (Qualitative) | -                   | -                 | -               | -                  | -             | -                     | -               | -                 |
| Fit between research question and method of analysis                                                                      | 3                   | 3                 | 3               | 3                  | 3             | 3                     | 3               | 2                 |
| Good justification for analytical method selected                                                                         | 1                   | 2                 | 3               | 2                  | 2             | 1                     | 3               | 1                 |
| Assessment of reliability of analytical process (Qualitative only)                                                        | -                   | -                 | -               | -                  | -             | -                     | -               | -                 |
| Evidence of user involvement in design                                                                                    | 0                   | 0                 | 0               | 0                  | 0             | 2                     | 0               | 0                 |
| Strengths and limitations critically discussed                                                                            | 3                   | 3                 | 3               | 2                  | 3             | 3                     | 3               | 2                 |
